# Supplementary material
Source: PubMed Central journal article supplement (PMC2607166)
Supplement: supp_74_24_7809__1.pdf [file supp_74_24_7809__1.pdf]

## SUPPLEMENTAL METHODS

1  
2 **Microarray construction and validation.** The microarray experiments in this study were  
3 performed using glass slides spotted with unique 70-mer oligonucleotides corresponding to all 835  
4 annotated ORFs from the *R. prowazekii* genome sequence. 70-mer oligonucleotides were designed  
5 from these sequences by using ArrayOligoSelector (3). All 70-mer oligonucleotides were verified  
6 as specific for *R. prowazekii* and not *Mus musculus* (the host cell used for rickettsial infections)  
7 under the conditions of hybridization used in this study using the BLAST algorithm (1, 2). The  
8 arrays consisted of two unique 70-mer oligonucleotides for 666 *R. prowazekii* ORFs and, by  
9 necessity, a single unique oligonucleotide for the remaining 169 ORFs. The oligos were  
10 synthesized by using standard methods by Illumina (San Diego). The oligonucleotides were  
11 dissolved at a concentration of 50 mM in  $3 \times$  SSC with 0.75 M betaine and were printed in  
12 duplicate on MWG Epoxy slides (MWG Biotech, Ebersburg, Germany) by a locally constructed  
13 linear servo arrayer (after the DeRisi model) (4). The oligonucleotides were spotted in triplicate. In  
14 addition, oligonucleotide probes corresponding to 32 mouse genes were included as negative  
15 controls and oligonucleotide probes corresponding to 10 *Arabidopsis thaliana* genes (SpotReport®  
16 Oligo Array Validation System, Stratagene) were included as reaction controls. *A. thaliana* mRNA  
17 spikes (Stratagene) were mixed with RNA samples to assess cDNA synthesis and labeling  
18 efficiencies in each reaction.

19 As an initial array validation experiment, samples containing 1 and 4  $\mu$ g of rickettsial total  
20 RNA taken from a single isolation were converted cDNA using random hexamers and labeled  
21 using the 3DNA Array 900MPX Detection system from Genisphere. The Genisphere detection  
22 system employs indirect labeling using fluorescent dendrimers subsequent to cDNA synthesis. In  
23 an independent experiment, the dyes were reversed to control for any labeling differences (technical  
24 replicates). The cDNA was hybridized to the microarray (in duplicate with a dye swap), labeled,

1 and analyzed without any normalization of the data other than background subtraction. Under these  
2 conditions, all rickettsial oligonucleotide probes were expected to show a four-fold difference in  
3 intensity between two samples. This analysis demonstrated that the rickettsial oligonucleotide  
4 probes on the microarray performed as expected giving an overall ratio of 4:1 (**Fig. S2**). In  
5 addition, the validation experiment showed that all probes demonstrated a significant hybridization  
6 signal (either a signal intensity > 200 or signal/local background ratio > 2) in the 1 µg RNA sample  
7 indicating that all 835 putative *R. prowazekii* mRNAs could be detected in our analyses. We also  
8 verified that there was minimal background hybridization from mouse RNA by labeling and  
9 hybridization mouse total RNA from a mock infection (pre-treated with MICROBEnrich) to the  
10 rickettsial microarray (data not shown). For all other microarray experiments, control and heat  
11 shock samples were hybridized to a glass slide microarray overnight (42 °C), labeled, and scanned  
12 at both high and low photomultiplier tube settings. The resulting values were corrected for  
13 background, normalized using a Lowess algorithm, and analyzed using Genespring 7.1 and  
14 Microsoft Excel.

**Table S1. Quantitative RT-PCR Primer Sequences. <sup>a</sup>**

---

RP042

RT primer 5'-TTA GCA AAA ATG GGT AAA ACG AGA TAC-3'

Q-PCR forward primer 5'-AAT ATC GGC AAT AGC TGA AG-3'

Q-PCR reverse primer 5'-CGT GCT GAT CTA GAT TGT CC-3'

RP044

RT primer 5'-TTA TAC TCC ATG GCG TTC TGC-3'

Q-PCR forward primer 5'-ATA CGA CCC TGA TCT TGA TG-3'

Q-PCR reverse primer 5'-TAT TCA TTG CAC AAC TAC CG-3'

RP626

RT primer 5'-TTA GAA GTC CAT ACC ACC CAT G-3'

Q-PCR forward primer 5'-CCG AAA ATT ACA AAA GAT GG-3'

Q-PCR reverse primer 5'-GCT GCA ACC AAC TTA TTA CC-3'

RP629

RT primer 5'-TTA AGG TTT TTT AAC TAC TTG TAC TGC AG-3'

Q-PCR forward primer 5'-AGC CTT AAA AGC CGA GAT TG-3'

Q-PCR reverse primer 5'-TCA TCT GCA CAC CGG AAA TA-3'

---

<sup>a</sup> All PCRs were run using the same conditions which included an initial denaturation step of 95 °C for 120 sec followed by cycling at 95 °C for 15 sec; 50 °C for 15 sec; 72 °C for 15 sec for a total of 40 cycles.

## SUPPLEMENTAL FIGURE LEGENDS

1  
2 **FIG. S1.** Purification and enrichment of total *R. prowazekii* RNA. (A) Total RNA from  
3 rickettsiae-infected L929 mouse fibroblast cells. (B) Rickettsiae-infected L929 cells were broken  
4 by ballistic shearing, rickettsiae purified by differential centrifugation and total RNA isolated. (C)  
5 Total RNA from panel (B) was further purified by Ambion's MICROBEnrich. (D) The rickettsial  
6 pellet isolated by differential centrifugation was further purified by centrifugation through 25%  
7 Renograffin and total RNA isolated. In all cases, RNA was extracted as described in Materials and  
8 Methods and total RNA (L-cell and rickettsial) quality and quantity was determined using an  
9 Agilent Bioanalyzer.

10 **FIG. S2.** Microarray validation. Total *R. prowazekii* RNA from a single extraction was used to  
11 prepare cDNA labeling reactions using 1 and 4  $\mu\text{g}$  for microarray hybridization as described in  
12 Material and Methods. A background subtraction was performed and the data plotted with no other  
13 normalization. The data showed an expected four-fold difference between the two samples. The  
14 line of unity (ratio of 1) is shown in green flanked by two lines representing a two-fold change. All  
15 *R. prowazekii* mRNAs were tagged as present (either a signal intensity  $> 200$  or signal/local  
16 background ratio  $> 2$ ) in both the 1 and 4  $\mu\text{g}$  RNA samples.

17 **FIG. S3.** Verification of array results by quantitative RT-PCR. Panel (A) depicts a representative  
18 plot of qRT-PCR results for the heat shock gene RP044 under control (34 °C, closed squares) and  
19 heat shock (42 °C, open squares) conditions. Equal amounts of total rickettsial RNA from control  
20 and heat shock experiments (determined using the Agilent Bioanalyzer) were converted to cDNA  
21 using reverse primers specific to the genes of interest. The RT reactions were treated with RNaseH  
22 and serially diluted four-fold. qPCR was performed in duplicate on each dilution using a pair of

1 nested primers for each of the genes tested (both data points are shown on the representative plot).  
2 Cycle threshold (CT) was plotted against  $\log_{10}$  template concentration. Linear regression analysis  
3 was used to determine reaction efficiency where  $E = 10^{(-1/\text{slope})}$  (5) and  $R^2$  values are reported.  
4 Theoretical data are shown for a reaction working at optimal efficiency (closed diamonds); by  
5 definition, a PCR running at optimal efficiency will result in a doubling of product for every cycle  
6 run ( $E = 2$ ) which is represented by a line with a slope of  $-3.3$ . Controls without the addition of RT  
7 were performed to confirm the absence of contaminating DNA. Panel (B) shows the qRT-PCR data  
8 from biological replicates 3 and 4 (additional RNA was available from these experiments). Using  
9 the protocol described above the average slope from multiple qPCR runs was used to determine a  
10 reaction efficiency ( $E$ ) for each primer set ( $CV \leq 0.1$ , standard deviations reported in the table).  $CT_i$   
11 is the ordinate intercept of the linear regression for the control and heat shock samples. Fold  
12 induction was calculated as  $E^{(CT_i \text{ control} - CT_i \text{ heat shock})}$  (modified from (5)).

**FIG. S1.**

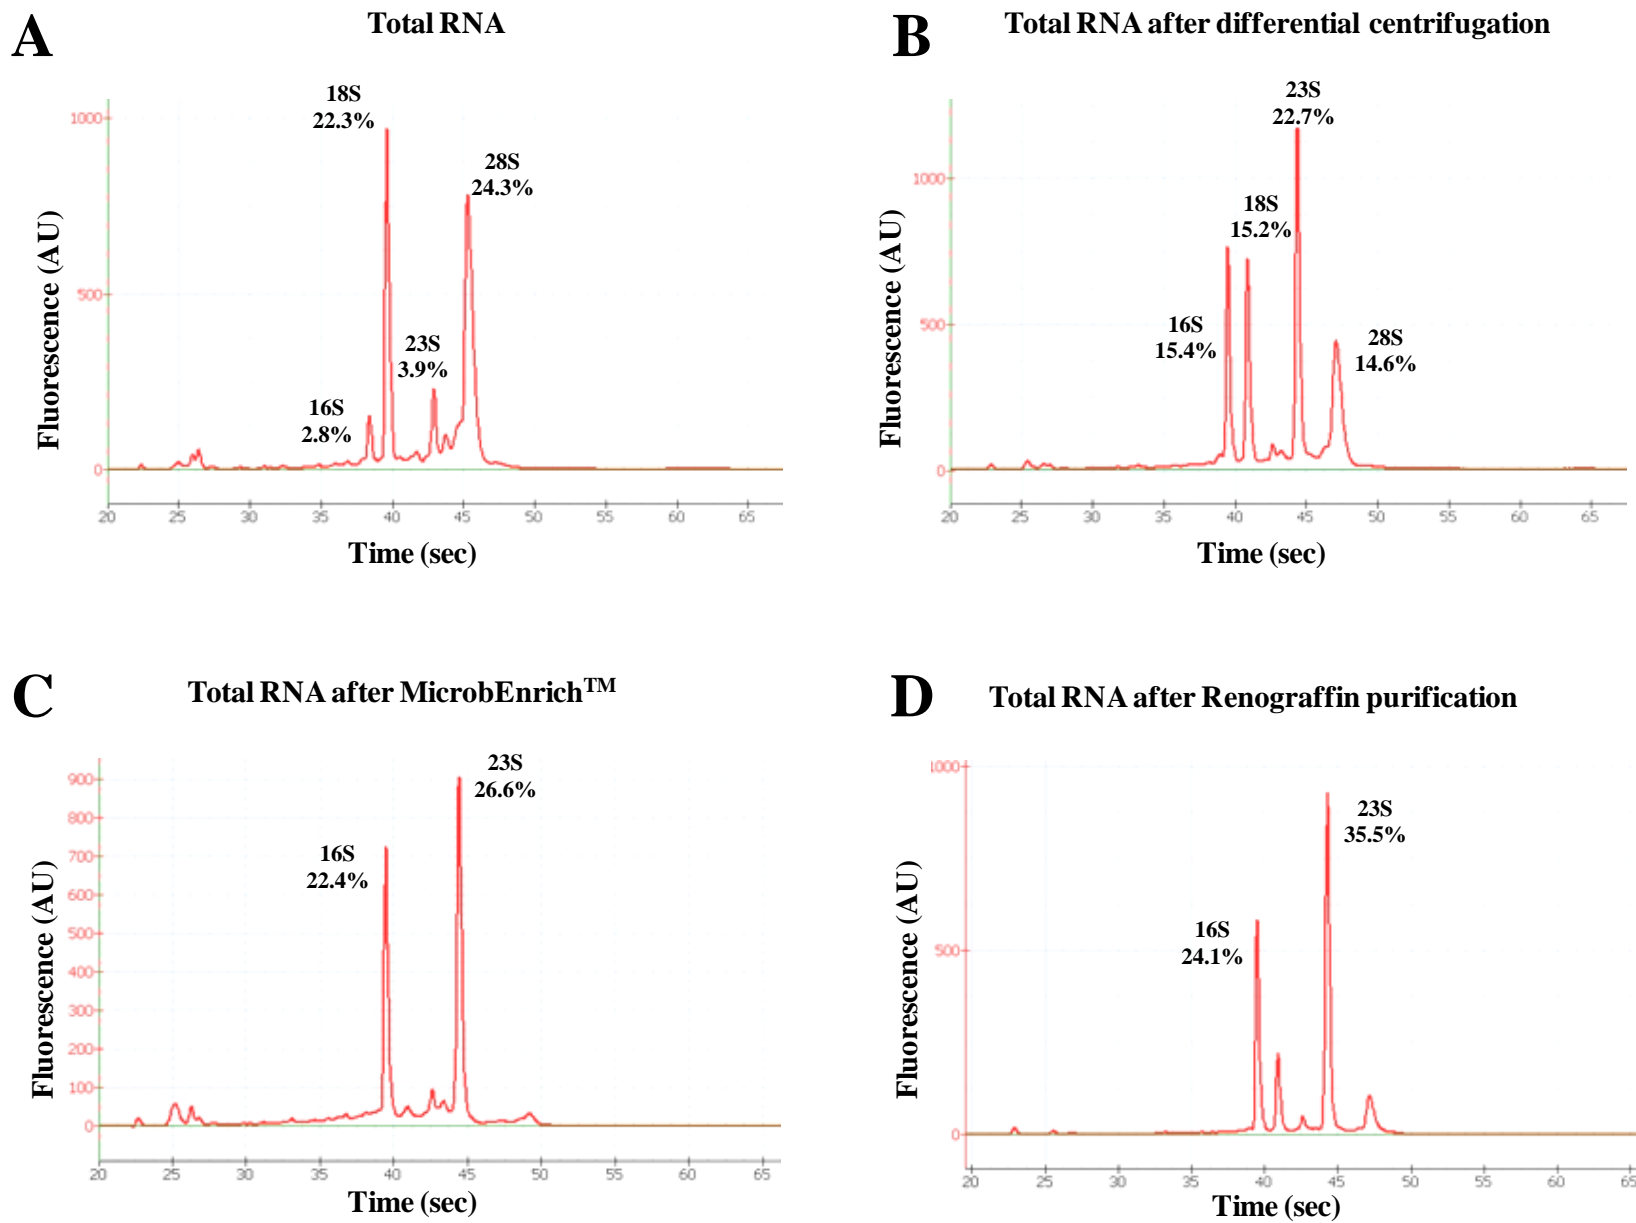

**FIG. S2.**

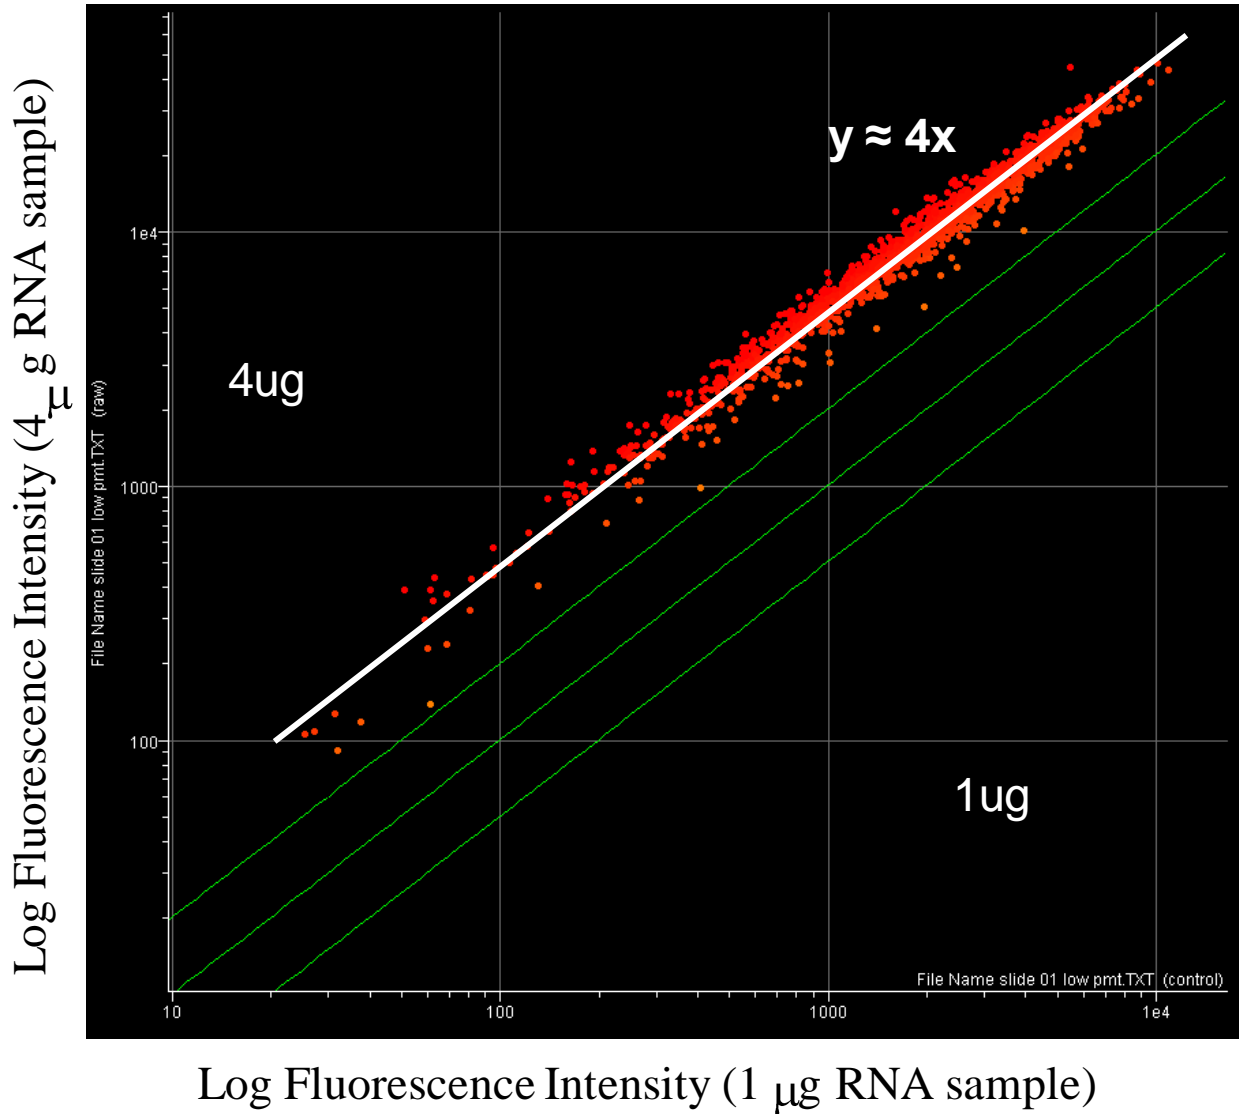

**FIG. S3.**

**A**

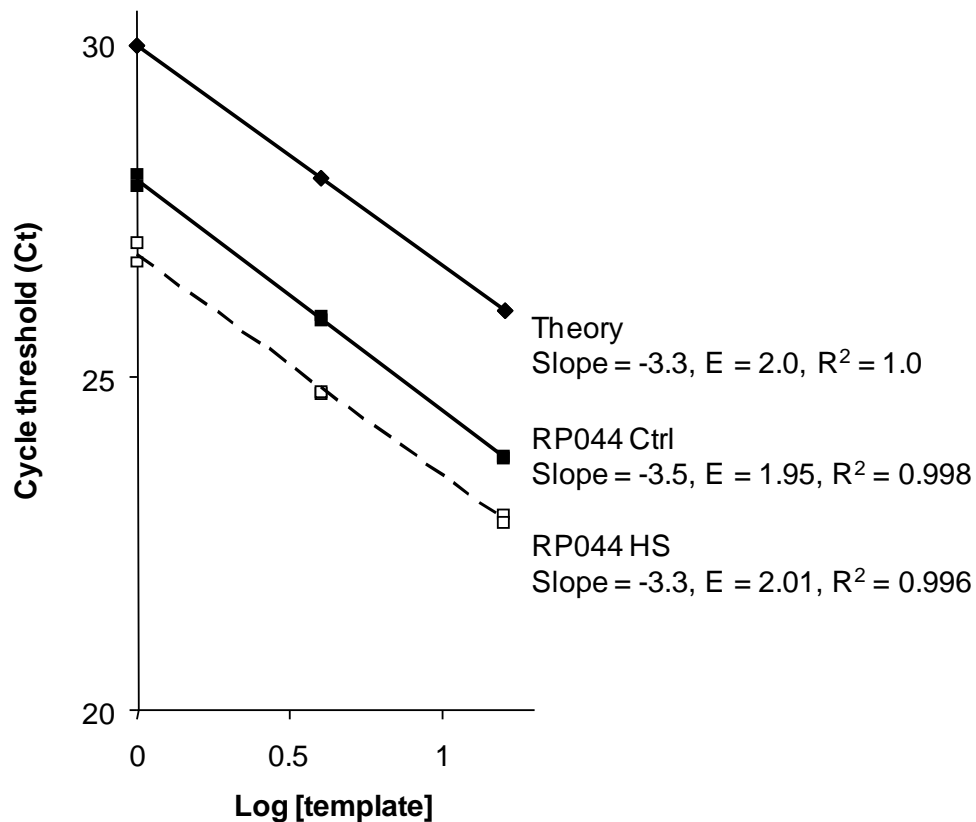

**B**

|              | Average Reaction Efficiency (E) | Biological Replicate 3 |            |                | Biological Replicate 4 |            |                |
|--------------|---------------------------------|------------------------|------------|----------------|------------------------|------------|----------------|
|              |                                 | CT <sub>i</sub>        |            |                | CT <sub>i</sub>        |            |                |
|              |                                 | Control                | Heat Shock | Fold Induction | Control                | Heat Shock | Fold Induction |
| <b>RP044</b> | 2.02 ± 0.08                     | 24.19                  | 22.32      | 3.7            | 23.80                  | 22.84      | 2.0            |
| <b>RP626</b> | 2.21 ± 0.06                     | 19.51                  | 15.98      | 16.3           | 19.53                  | 16.63      | 9.9            |
| <b>RP629</b> | 2.16 ± 0.15                     | 20.74                  | 20.17      | 1.6            | 22.40                  | 20.93      | 3.1            |



## SUPPLEMENTAL REFERENCES

1. **Altschul, S. F., W. Gish, W. Miller, E. W. Myers, and D. J. Lipman.** 1990. Basic local alignment search tool. *J. Mol. Biol.* **215**:403-10.
2. **Altschul, S. F., T. L. Madden, A. A. Schaffer, J. Zhang, Z. Zhang, W. Miller, and D. J. Lipman.** 1997. Gapped BLAST and PSI-BLAST: a new generation of protein database search programs. *Nucleic Acids Res.* **25**:3389-402.
3. **Bozdech, Z., J. Zhu, M. P. Joachimiak, F. E. Cohen, B. Pulliam, and J. L. DeRisi.** 2003. Expression profiling of the schizont and trophozoite stages of *Plasmodium falciparum* with a long-oligonucleotide microarray. *Genome Biol.* **4**:R9.
4. **Lashkari, D. A., J. L. DeRisi, J. H. McCusker, A. F. Namath, C. Gentile, S. Y. Hwang, P. O. Brown, and R. W. Davis.** 1997. Yeast microarrays for genome wide parallel genetic and gene expression analysis. *Proc. Natl. Acad. Sci. U. S. A.* **94**:13057-13062.
5. **Pfaffl, M. W.** 2001. A new mathematical model for relative quantification in real-time RT-PCR. *Nucleic Acids Res.* **29**:e45.
